# Supplementary material
Source: PubMed Central journal article supplement (PMC5837308)
Supplement: kfx107_supp.pdf [file kfx107_supp.pdf]

## SUPPLEMENTARY DATA

### Supplementary Tables

|                          | Experiment 1 |      |    | Experiment 2 |      |    | Experiment 3 |      |    |
|--------------------------|--------------|------|----|--------------|------|----|--------------|------|----|
| [ <sup>3</sup> H]E2 (nM) | Mean pmol    | %CV  | N  | Mean pmol    | %CV  | N  | Mean pmol    | %CV  | N  |
| 1                        | 0.0067       | 8.0  | 10 | 0.0035       | 28.0 | 10 | 0.0060       | 14.0 | 10 |
| 5                        | 0.0385       | 7.6  | 10 | 0.0416       | 8.4  | 10 | 0.0290       | 11.8 | 10 |
| 10                       | 0.0856       | 6.7  | 10 | 0.0741       | 23.3 | 10 | 0.0641       | 19.3 | 10 |
| 36.7                     | 0.3079       | 15.5 | 10 | 0.3187       | 11.4 | 10 | 0.2856       | 15.0 | 10 |

**Table S1.** Intra-experimental variation in pmol uptake at four different concentrations with one-hour treatment. Mean calculated by averaging the uptake in pmol of each individual embryo from a single experiment. %CV = Coefficient of variation expressed as a percent (standard deviation ÷ mean, x 100). N = number of embryos per well. One well from a single clutch of embryos was tested per concentration per experiment. Note that at 1 nM, mean [<sup>3</sup>H]E2 uptake was below the limit of detection (0.01 pmol).

|                          | Experiment 1  |      |    | Experiment 2  |      |    | Experiment 3  |      |    |
|--------------------------|---------------|------|----|---------------|------|----|---------------|------|----|
| [ <sup>3</sup> H]E2 (nM) | Mean % uptake | %CV  | N  | Mean % uptake | %CV  | N  | Mean % uptake | %CV  | N  |
| 1                        | 0.2760        | 14.6 | 10 | 0.2910        | 29.7 | 10 | 0.3050        | 8.9  | 10 |
| 5                        | 0.4640        | 12.7 | 10 | 0.3640        | 9.0  | 10 | 0.3330        | 8.1  | 10 |
| 10                       | 0.2910        | 20.5 | 10 | 0.2360        | 25.1 | 10 | 0.3460        | 7.0  | 10 |
| 36.7                     | 0.2990        | 16.1 | 10 | 0.3290        | 12.4 | 10 | 0.2770        | 15.6 | 10 |

**Table S2.** Intra-experimental variation in percent uptake at four different concentrations with one-hour treatment. Mean calculated by averaging the percent uptake of each individual embryo from a single experiment. %CV = Coefficient of variation expressed as a percent (standard deviation ÷ mean, x 100). N = number of embryos per well. One well from a single clutch of embryos was tested per concentration per experiment.

| 1-Hour Exposure                 |                       |                       |                                    |                            |         |
|---------------------------------|-----------------------|-----------------------|------------------------------------|----------------------------|---------|
| [ <sup>3</sup> H]E2 pmol uptake |                       |                       |                                    |                            |         |
| Treatment Period (hpf)          | mean pmol uptake (SD) | compared period (hpf) | mean uptake difference from 6 hpf  | adjusted p-value vs 6 hpf  | summary |
| 6 to 7                          | 0.0179 (0.004)        | 24 to 25              | 0.0195                             | 0.0064                     | **      |
|                                 |                       | 48 to 49              | 0.0185                             | 0.0093                     | **      |
|                                 |                       | 72 to 73              | 0.0516                             | <0.0001                    | ****    |
|                                 |                       | 96 to 97              | 0.1102                             | <0.0001                    | ****    |
| Treatment Period (hpf)          | mean pmol uptake (SD) | compared period (hpf) | mean uptake difference from 24 hpf | adjusted p-value vs 24 hpf | summary |
| 24 to 25                        | 0.03741 (0.003)       | 48 to 49              | -0.0010                            | 0.9994                     | ns      |
|                                 |                       | 72 to 73              | 0.0321                             | 0.0002                     | ***     |
|                                 |                       | 96 to 97              | 0.0907                             | <0.0001                    | ****    |
| Treatment Period (hpf)          | mean pmol uptake (SD) | compared period (hpf) | mean uptake difference from 48 hpf | adjusted p-value vs 48 hpf | summary |
| 48 to 49                        | 0.03639 (0.007)       | 72 to 73              | 0.0331                             | 0.0001                     | ***     |
|                                 |                       | 96 to 97              | 0.0917                             | <0.0001                    | ****    |
| Treatment Period (hpf)          | mean pmol uptake (SD) | compared period (hpf) | mean uptake difference from 72 hpf | adjusted p-value vs 72 hpf | summary |
| 72 to 73                        | 0.0695 (0.003)        | 96 to 97              | 0.0586                             | <0.0001                    | ****    |
| [ <sup>3</sup> H]E2 % uptake    |                       |                       |                                    |                            |         |
| Treatment Period (hpf)          | mean % uptake (SD)    | compared period (hpf) | mean uptake difference from 6 hpf  | adjusted p-value vs 6 hpf  | summary |
| 6 to 7                          | 0.1025 (0.025)        | 24 to 25              | 0.1408                             | 0.0620                     | ns      |
|                                 |                       | 48 to 49              | 0.2808                             | 0.0005                     | ***     |
|                                 |                       | 72 to 73              | 0.4942                             | <0.0001                    | ****    |
|                                 |                       | 96 to 97              | 0.7975                             | <0.0001                    | ****    |
| Treatment Period (hpf)          | mean % uptake (SD)    | compared period (hpf) | mean uptake difference from 24 hpf | adjusted p-value vs 24 hpf | summary |
| 24 to 25                        | 0.2433 (0.029)        | 48 to 49              | 0.1400                             | 0.0880                     | ns      |
|                                 |                       | 72 to 73              | 0.3533                             | 0.0001                     | ***     |
|                                 |                       | 96 to 97              | 0.6567                             | <0.0001                    | ****    |
| Treatment Period (hpf)          | mean % uptake (SD)    | compared period (hpf) | mean uptake difference from 48 hpf | adjusted p-value vs 48 hpf | summary |
| 48 to 49                        | 0.3833 (0.068)        | 72 to 73              | 0.2133                             | 0.0076                     | **      |
|                                 |                       | 96 to 97              | 0.5167                             | <0.0001                    | ****    |
| Treatment Period (hpf)          | mean % uptake (SD)    | compared period (hpf) | mean uptake difference from 72 hpf | adjusted p-value vs 72 hpf | summary |
| 72 to 73                        | 0.5967 (0.083)        | 96 to 97              | 0.3033                             | 0.0005                     | ***     |

**Table S3.** Comparison of uptake at different developmental stages with one-hour exposure. Adjusted p-values calculated with one-way ANOVA with Tukey's multiple comparisons test, comparing pmol or percent uptake between one-hour exposure groups when starting treatment at 6, 24, 48, 72, or 96 hpf. \*p < 0.05, \*\*p < 0.01, \*\*\*p < 0.001, \*\*\*\*p < 0.0001, ns not significant p ≥ 0.05.

| 24-Hour Exposure                |                       |                       |                                    |                            |         |
|---------------------------------|-----------------------|-----------------------|------------------------------------|----------------------------|---------|
| [ <sup>b</sup> H]E2 pmol uptake |                       |                       |                                    |                            |         |
| Treatment Period (hpf)          | mean pmol uptake (SD) | compared period (hpf) | mean uptake difference from 6 hpf  | adjusted p-value vs 6 hpf  | summary |
| 6 to 30                         | 0.1303 (0.013)        | 24 to 48              | 0.0888                             | 0.1682                     | ns      |
|                                 |                       | 48 to 72              | 0.2241                             | 0.0005                     | ***     |
|                                 |                       | 72 to 96              | 0.7235                             | <0.0001                    | ****    |
|                                 |                       | 96 to 120             | 0.4758                             | <0.0001                    | ****    |
| Treatment Period (hpf)          | mean pmol uptake (SD) | compared period (hpf) | mean uptake difference from 24 hpf | adjusted p-value vs 24 hpf | summary |
| 24 to 48                        | 0.2192 (0.015)        | 48 to 72              | 0.1352                             | 0.0407                     | *       |
|                                 |                       | 72 to 96              | 0.6346                             | <0.0001                    | ****    |
|                                 |                       | 96 to 120             | 0.3870                             | <0.0001                    | ****    |
| Treatment Period (hpf)          | mean pmol uptake (SD) | compared period (hpf) | mean uptake difference from 48 hpf | adjusted p-value vs 48 hpf | summary |
| 48 to 72                        | 0.3544 (0.057)        | 72 to 96              | 0.4994                             | <0.0001                    | ****    |
|                                 |                       | 96 to 120             | 0.2517                             | 0.0003                     | ***     |
| Treatment Period (hpf)          | mean pmol uptake (SD) | compared period (hpf) | mean uptake difference from 72 hpf | adjusted p-value vs 72 hpf | summary |
| 72 to 96                        | 0.8538 (0.071)        | 96 to 120             | -0.2477                            | 0.0003                     | ***     |
| [ <sup>a</sup> H]E2 % uptake    |                       |                       |                                    |                            |         |
| Treatment Period (hpf)          | mean % uptake (SD)    | compared period (hpf) | mean uptake difference from 6 hpf  | adjusted p-value vs 6 hpf  | summary |
| 6 to 30                         | 0.832 (0.100)         | 24 to 48              | 1.031                              | 0.4151                     | ns      |
|                                 |                       | 48 to 72              | 2.988                              | 0.0023                     | **      |
|                                 |                       | 72 to 96              | 6.548                              | <0.0001                    | ****    |
|                                 |                       | 96 to 120             | 4.628                              | <0.0001                    | ****    |
| Treatment Period (hpf)          | mean % uptake (SD)    | compared period (hpf) | mean uptake difference from 24 hpf | adjusted p-value vs 24 hpf | summary |
| 24 to 48                        | 1.863 (0.155)         | 48 to 72              | 1.958                              | 0.0627                     | ns      |
|                                 |                       | 72 to 96              | 5.518                              | <0.0001                    | ****    |
|                                 |                       | 96 to 120             | 3.598                              | 0.0003                     | ***     |
| Treatment Period (hpf)          | mean % uptake (SD)    | compared period (hpf) | mean uptake difference from 48 hpf | adjusted p-value vs 48 hpf | summary |
| 48 to 72                        | 3.82 (0.541)          | 72 to 96              | 3.560                              | 0.0013                     | **      |
|                                 |                       | 96 to 120             | 1.640                              | 0.1450                     | ns      |
| Treatment Period (hpf)          | mean % uptake (SD)    | compared period (hpf) | mean uptake difference from 72 hpf | adjusted p-value vs 72 hpf | summary |
| 72 to 96                        | 7.38 (1.370)          | 96 to 120             | -1.920                             | 0.0694                     | ns      |

**Table S4.** Comparison of uptake at different developmental stages with 24-hour exposure. Adjusted p-values calculated with one-way ANOVA with Tukey's multiple comparisons test, comparing pmol or percent uptake between 24-hour exposure groups when starting treatment at 6, 24, 48, 72, or 96 hpf. \*p < 0.05, \*\*p < 0.01, \*\*\*p < 0.001, \*\*\*\*p < 0.0001, ns not significant p ≥ 0.05.

## Supplementary Figures

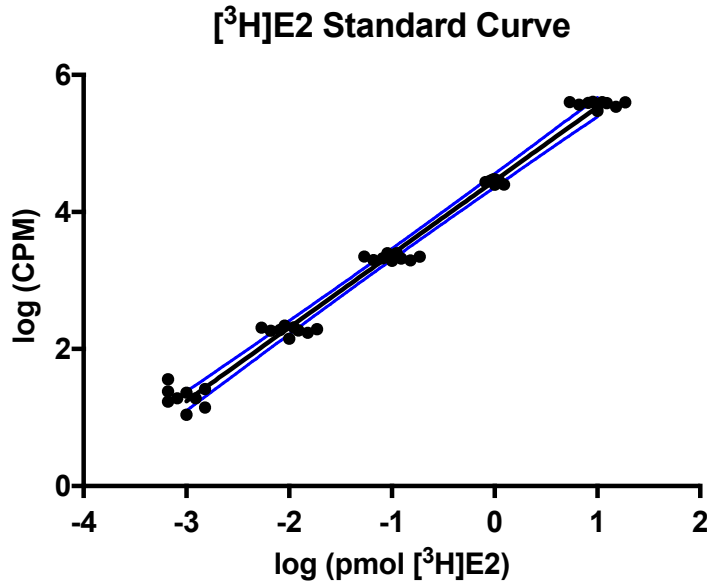

**Figure S1. Standard curve for pmol [<sup>3</sup>H]E2 uptake calculations.** The radioactivity of 10  $\mu$ L of a known concentration of [<sup>3</sup>H]E2 was measured on a scintillation counter in triplicate on three different days for a total of 9 measurements per concentration (black circles). A linear relationship was found when performing a power analysis of the mean of each concentration,  $Y = 1.073 \cdot X + 4.459$  where  $X = \log(\text{pmol } [^3\text{H}]E2)$  and  $Y = \log(\text{CPM})$ .  $r^2 = 0.9992$  (unweighted, best-fit linear regression line). Outer blue lines represent 95% CI.

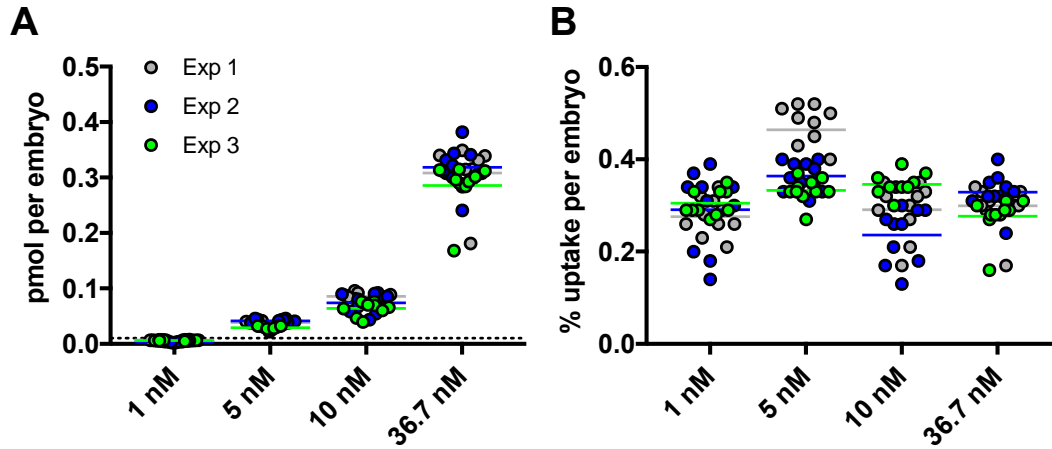

**Figure S2. Individual embryo variability within experiments. (A-B)** Experiments from Figure 1 (1-hour treatment starting at 48 hpf) displayed where each dot represents the pmol (**A**) or percent (**B**) [<sup>3</sup>H]E2 uptake from a single embryo. Experimental replicates (n=10 embryos per experiment) are represented as different colored dots (grey, blue, or green) in the graph. Horizontal lines (grey, blue or green) are the mean from each experiment.

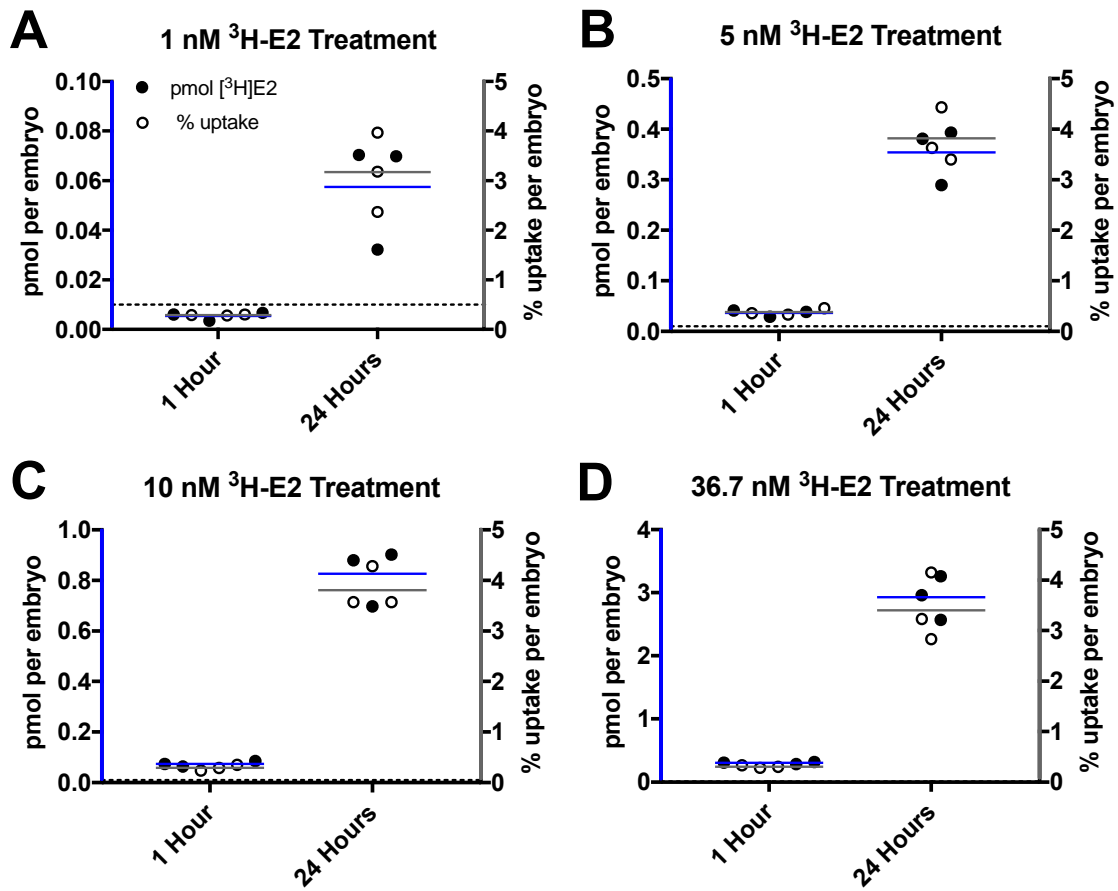

**Figure S3. Estradiol uptake increases with increasing exposure duration. (A-D)** Data from Figure 1 displayed to highlight the change in absolute (black circles) or percent (white circles) uptake with increasing exposure duration at **(A)** 1 nM, **(B)** 5 nM, **(C)** 10 nM, and **(D)** 36.7 nM [<sup>3</sup>H]E2 treatment. There was an increase of approximately 10-fold with each concentration when increasing treatment duration from 1 hour to 24 hours.

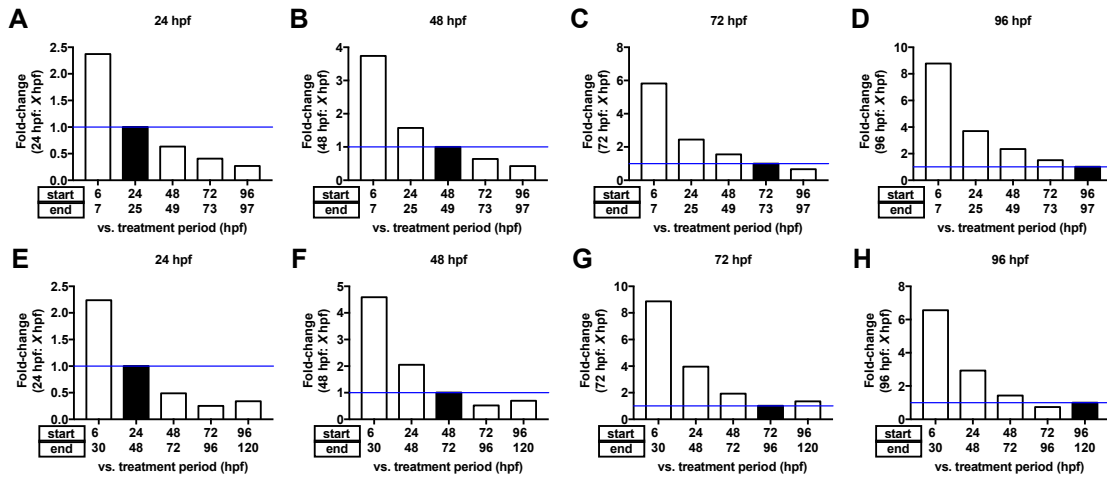

**Figure S4. Estradiol uptake is age-dependent.** Fold-change in percent uptake between embryos of developmental stages tested in Figure 2A, 2B at 1- and 24-hour exposures. Labels on x-axis describe the treatment group as compared to all other treatment groups. Fold-change was calculated by dividing the mean percent uptake of each developmental stage by the mean percent uptake of every other developmental stage (n=3-5 experiments). The blue line at y=1 represents no change between groups. Below this line represents lower uptake, above this line represents higher uptake. The black bar in each graph represents comparison to self. **(A-D)** 1-hour exposure to 5 nM [<sup>3</sup>H]E2 starting at **(A)** 24 hpf, **(B)** 48 hpf, **(C)** 72 hpf, **(D)** 96 hpf. **(E-H)** 24-hour exposure to 5 nM [<sup>3</sup>H]E2 starting at **(E)** 24 hpf, **(F)** 48 hpf, **(G)** 72 hpf, **(H)** 96 hpf. Percent uptake increased with increasing developmental stage up to 96 hpf with 1-hour exposure, while percent uptake increased up to the 72 hpf developmental stage and then plateaued with 24-hour exposure.
